# Supplementary material for: The Contribution of CD40/CD40L Axis in Inflammatory Bowel Disease: An Update
Source: PubMed Central journal article supplement (PMC4607859; doi:10.3389/fimmu.2015.00529), 2015-10-16
Supplement: table_1.pdf [file table_1.pdf]

**Table S1 | Cell types expressing the CD40/CD40L dyad.**

| Cell Type                      | CD40    |           | CD40L   |           | Forms of CD40L    |
|--------------------------------|---------|-----------|---------|-----------|-------------------|
|                                | Resting | Activated | Resting | Activated |                   |
| CD4 <sup>+</sup> T lymphocytes | -       | +++       | -       | +++       | Membrane, soluble |
| B lymphocytes                  | +++     | +++       | ++      | +++       | Membrane          |
| Macrophages                    | +       | +++       | +       | +++       | Membrane          |
| Platelets                      | ++      | +++       | -       | +++       | Membrane, soluble |
| Dendritic cells (DCs)          | -       | +++       | ++      | +++       | Membrane          |
| Neutrophils                    | +       | +++       | +       | +         | Membrane          |
| Endothelial cells              | +       | +++       | +       | +         | Membrane          |
| SMCs                           | +++     | N/A       | +       | N/A       | Membrane          |

*N/A, no documentation available; -, no expression; +, weak expression; ++, average expression; +++, strong expression.*
