# Supplementary material for: The Contribution of CD40/CD40L Axis in Inflammatory Bowel Disease: An Update
Source: PubMed Central journal article supplement (PMC4607859; doi:10.3389/fimmu.2015.00529), 2015-10-16
Supplement: table_2.pdf [file table_2.pdf]

**Table S2 | Cell type specific CD40/CD40L-induced signaling.**

| <b>CD40/CD40L axis</b>  |                                                                                                                                                                                                                                                                                                                                                                                                   |
|-------------------------|---------------------------------------------------------------------------------------------------------------------------------------------------------------------------------------------------------------------------------------------------------------------------------------------------------------------------------------------------------------------------------------------------|
| <b>Cell type</b>        | <b>Physiologic effect</b>                                                                                                                                                                                                                                                                                                                                                                         |
| B lymphocyte            | <ul style="list-style-type: none"> <li>- Isotype switching</li> <li>- Expression of MHC-I, MHC-II, VCAM-1, ICAM-1, LFA-1, FcεRII, B7.1, B7.2, and Fas</li> <li>- Cytokine production (IL-6, IL-10, TNF-α, TGF- β, and LT-α)</li> </ul>                                                                                                                                                            |
| Monocyte/<br>Macrophage | <ul style="list-style-type: none"> <li>- Up-regulation of co-stimulatory activity (ICAM-1, LFA-3, B7.1, and B7.2)</li> <li>- Myeloperoxidase secretion</li> <li>- Cytokine secretion (IL-1β, IL-6, IL-8, IL-12, and TNF-α)</li> <li>- MMP secretion (MMP-1, MMP-2, MMP-3, and MMP-9)</li> <li>- TF secretion</li> </ul>                                                                           |
| Platelet                | <ul style="list-style-type: none"> <li>- Platelet activation</li> <li>- RANTES and ROS secretion</li> </ul>                                                                                                                                                                                                                                                                                       |
| Dendritic cells (DCs)   | <ul style="list-style-type: none"> <li>- Cytokine secretion (IL-10 and IL-12)</li> <li>- Up-regulation of co-stimulatory activity (CD40, CD40L, MHC-I, MHC-II, B7.1, and B7.2)</li> </ul>                                                                                                                                                                                                         |
| Neutrophil              | ROS production - Enhanced Mac-1 expression                                                                                                                                                                                                                                                                                                                                                        |
| Endothelial cell        | <ul style="list-style-type: none"> <li>- Up-regulation of adhesion molecules (E-selectin, VCAM-1, and ICAM-1)</li> <li>- Chemokines and cytokines secretion (IL-1, IL-6, IL-8, MCP-1, MIP-1α, and RANTES)</li> <li>- ROS production - MMP secretion (MMP-1, MMP-3, and MMP-9) - Growth factor secretion (VEGF, FGF, and PAF)</li> <li>- TF secretion</li> <li>- Up-regulation of COX-2</li> </ul> |
| SMC                     | Chemokines and cytokines secretion (IL-1β, IL- 6, IL-8, and MCP-1) - MMP secretion (MMP-1, MMP-3, and MMP-9) - TF secretion - Up-regulation of COX-2                                                                                                                                                                                                                                              |
| T lymphocyte            | CD8+ memory T lymphocyte generation                                                                                                                                                                                                                                                                                                                                                               |
